# Crystal structure of the M<sub>5</sub> muscarinic acetylcholine receptor

Ziva Vuckovic<sup>1\*</sup>, Patrick R. Gentry<sup>1\*</sup>, Alice E. Berizzi<sup>1</sup>, Kunio Hirata<sup>2</sup>, Swapna Varghese<sup>3</sup>, Geoff Thompson<sup>1</sup>, Emma T. van der Westhuizen<sup>1</sup>, Wessel A.C. Burger<sup>1</sup>, Raphaël Rahmani<sup>3</sup>, Celine Valant<sup>1</sup>, Christopher J. Langmead<sup>1</sup>, Craig W. Lindsley<sup>4</sup>, Jonathan Baell<sup>3</sup>, Andrew B. Tobin<sup>5</sup>, Patrick M. Sexton<sup>1,6</sup>, Arthur Christopoulos<sup>1¶</sup> and David M. Thal<sup>1¶</sup>

1. Drug Discovery Biology and Department of Pharmacology, Monash Institute of Pharmaceutical Sciences, Monash University, Parkville 3052, Victoria, Australia

2. RIKEN, SPring-8 Center, Hyogo, Japan

3. Medicinal Chemistry, Monash Institute of Pharmaceutical Sciences, Monash University, Parkville 3052, Victoria, Australia

4. Departments of Pharmacology & Chemistry, Vanderbilt Center for Neuroscience Drug Discovery, Vanderbilt University, Nashville, Tennessee 37232, United States.

5. Centre for Translational Pharmacology, Institute of Molecular, Cell and Systems Biology, College of Medical, Veterinary and Life Sciences, University of Glasgow, Glasgow G12 8QQ, United Kingdom.

6. School of Pharmacy, Fudan University, Shanghai 201203, China.

\*These authors contributed equally to this work.

¶ To whom correspondence should be addressed:

David Thal, [david.thal@monash.edu](mailto:david.thal@monash.edu)

Arthur Christopoulos, [arthur.christopoulos@monash.edu](mailto:arthur.christopoulos@monash.edu)

32 **Abstract**

33 The human M<sub>5</sub> muscarinic acetylcholine receptor (mAChR) has recently emerged as an  
34 exciting therapeutic target for treating a range of disorders, including drug addiction. However,  
35 a lack of structural information for this receptor subtype has limited further drug development  
36 and validation. Here we report a high-resolution crystal structure of the human M<sub>5</sub> mAChR  
37 bound to the clinically used inverse agonist, tiotropium. This structure allowed for a  
38 comparison across all five mAChR family members that revealed important differences in both  
39 orthosteric and allosteric sites that could inform the rational design of selective ligands. These  
40 structural studies together with chimeric swaps between the extracellular regions of the M<sub>2</sub> and  
41 M<sub>5</sub> mAChR further revealed the structural insight into “kinetic-selectivity”, where ligands  
42 show differential residency times between related family members. Collectively, our study  
43 provides important insights into the nature of orthosteric and allosteric ligand interaction across  
44 the mAChR family that could be exploited for the design of selective ligands.

45

46 **Significance Statement**

47 The five subtypes of the muscarinic acetylcholine receptors (mAChRs) are expressed  
48 throughout the central and peripheral nervous system where they play a vital role in physiology  
49 and pathologies. Recently, the M<sub>5</sub> mAChR subtype has emerged as an exciting drug target for  
50 the treatment of drug addiction. We have determined the atomic structure of the M<sub>5</sub> mAChR  
51 bound to the clinically used inverse agonist tiotropium. The M<sub>5</sub> mAChR structure now allows  
52 for a full comparison of all five mAChR subtypes and reveals subtle differences in the  
53 extracellular loop (ECL) regions of the receptor that mediate orthosteric and allosteric ligand  
54 selectivity. Together these findings open the door for future structure-based design of selective  
55 drugs that target this therapeutically important class of receptors.

56

## 57 **Introduction**

58 The muscarinic acetylcholine (ACh) receptors (mAChRs) are Class A G protein-coupled  
59 receptors (GPCRs) that together with the nicotinic acetylcholine receptors facilitate the actions  
60 of the neurotransmitter, ACh, throughout the body. The mAChR family comprises five  
61 subtypes where M<sub>1</sub>, M<sub>3</sub>, and M<sub>5</sub> are preferentially coupled to the G<sub>q/11</sub> protein-mediated  
62 signalling pathways, and M<sub>2</sub> and M<sub>4</sub>, show preference for G<sub>i/o</sub> protein-dependent signalling.  
63 Localization studies have revealed that the mAChR subtypes are differentially distributed, with  
64 M<sub>1</sub>, M<sub>4</sub>, and M<sub>5</sub> mAChRs found predominantly in the central nervous system (CNS), where  
65 they are essential for normal neuronal function, while M<sub>2</sub> and M<sub>3</sub> mAChRs are expressed more  
66 widely, including in the periphery, where they are involved in cardiovascular as well as gut  
67 motility and secretory processes (1).

68

69 Given the involvement of mAChRs in such a wide range of fundamental physiological  
70 processes, they have long been valued as targets for novel therapeutics, in particular the central  
71 M<sub>1</sub> and M<sub>4</sub> mAChRs, which have garnered attention due to their involvement in cognition and  
72 memory (2). In contrast, relatively less is known about the M<sub>5</sub> mAChR subtype, which  
73 represents less than 2% of the total CNS mAChR population (3, 4). Despite its low level of  
74 expression, this receptor plays a vital role in the mesolimbic reward pathway due to its presence  
75 on dopaminergic neurons of the ventral tegmental area (VTA) (5-8). Additionally, there is a  
76 large population of non-neuronal M<sub>5</sub> mAChRs located within the endothelium of the cerebral  
77 vasculature, suggesting that the receptor may modulate cerebral vasodilatory processes (9, 10).  
78 These observations correlate well with phenotypic data from M<sub>5</sub> mAChR knockout mice where  
79 the cerebral vasculature is constitutively constricted, resulting in decreased cerebral blood flow  
80 (11, 12). Additionally, M<sub>5</sub> mAChR knockout mice exhibited attenuated reward-seeking  
81 behaviour to drugs of addiction, such as cocaine and morphine in self-administration and  
82 conditioned place-preference experiments (13-15). Moreover, in recent studies involving rats  
83 (16-18), ethanol-seeking behaviour and oxycodone self-administration were attenuated by the  
84 selective M<sub>5</sub> mAChR negative allosteric modulator (NAM) ML375 (19). From these studies,  
85 the M<sub>5</sub> mAChR has emerged as a potential target for the treatment of drug addiction.

86

87 Despite such promising data, further study of the M<sub>5</sub> mAChR has been hindered by a lack of  
88 selective small molecule tool compounds. Designing conventional small molecule ligands that  
89 target the orthosteric ACh binding site of individual mAChR subtypes has been challenging  
90 due to the highly conserved sequence homology of the mAChR orthosteric site residues (1),

91 and in part due to a lack of detailed structural information for all five receptor subtypes. While  
92 structures of the M<sub>1</sub>–M<sub>4</sub> mAChRs have been previously determined, there are no available  
93 structures for the M<sub>5</sub> mAChR. Therefore, to provide a complete structural comparison of all  
94 five family members and to gain insight into ligand binding we determined a high-resolution  
95 crystal structure of the M<sub>5</sub> mAChR.

96

## 97 **Results**

### 98 **Crystallization and determination of the M<sub>5</sub> mAChR structure.**

99 To determine the M<sub>5</sub> mAChR structure we designed a construct where residues 225-430 of  
100 intracellular loop 3 were removed and replaced with a T4 lysozyme (T4L) fusion protein.  
101 Additionally, to promote crystallization, the first 20 N-terminal amino acids were cleaved by a  
102 Tobacco Etch Virus (TEV) protease site engineered into the receptor (**Supplementary Figure**  
103 **1a**). The inverse agonist, tiotropium, was used to stabilize the inactive state as it has a slow  
104 dissociation rate at the M<sub>5</sub> mAChR (20), and was also used in the determination of the M<sub>1</sub>, M<sub>3</sub>,  
105 and M<sub>4</sub> mAChR structures (21, 22). The M<sub>5</sub>-T4L•tiotropium complex was crystallized in  
106 lipidic cubic phase (LCP), and crystals were obtained within 1-2 days; however, despite many  
107 rounds of optimization, diffraction was limited to 7 Å. To improve the resolution we built upon  
108 a study from Yasuda *et al.* (23) that predicted that mutation of the amino acid at position 3.39  
109 (numbered according to Ballesteros-Weinstein (24)) to Arg would create a thermostabilized  
110 receptor by promoting an ionic bond between this residue and the highly conserved D<sup>2.50</sup>  
111 residue. Recently, the same S<sup>3.39</sup>R mutation was applied to the M<sub>2</sub> mAChR resulting in a series  
112 of higher resolution structures (25). Although introduction of the S117<sup>3.39</sup>R mutation resulted  
113 in a construct that binds the antagonists NMS or tiotropium with a slightly reduced affinity  
114 relative to the WT M<sub>5</sub> mAChR, the effect of the mutation on reducing ACh affinity was  
115 substantially more pronounced (**Supplementary Figure 1b-e**), consistent with the ability of the  
116 construct to favour an inactive over an active state. Similar differential effects on antagonist  
117 versus agonist affinity were previously observed for S<sup>3.39</sup>R at the M<sub>2</sub> mAChR (25). Notably,  
118 introduction of the S117<sup>3.39</sup>R mutation increased our M<sub>5</sub> mAChR yields during purification and  
119 resulted in crystals that diffracted to a resolution of 3.4 Å. Data were collected from  
120 approximately 130 crystals, and the structure was determined by molecular replacement using  
121 the M<sub>3</sub> structure (PDB: 4U15) and an ensemble of T4L structures as templates (**Figure 1a,**  
122 **Supplementary Table 1**).

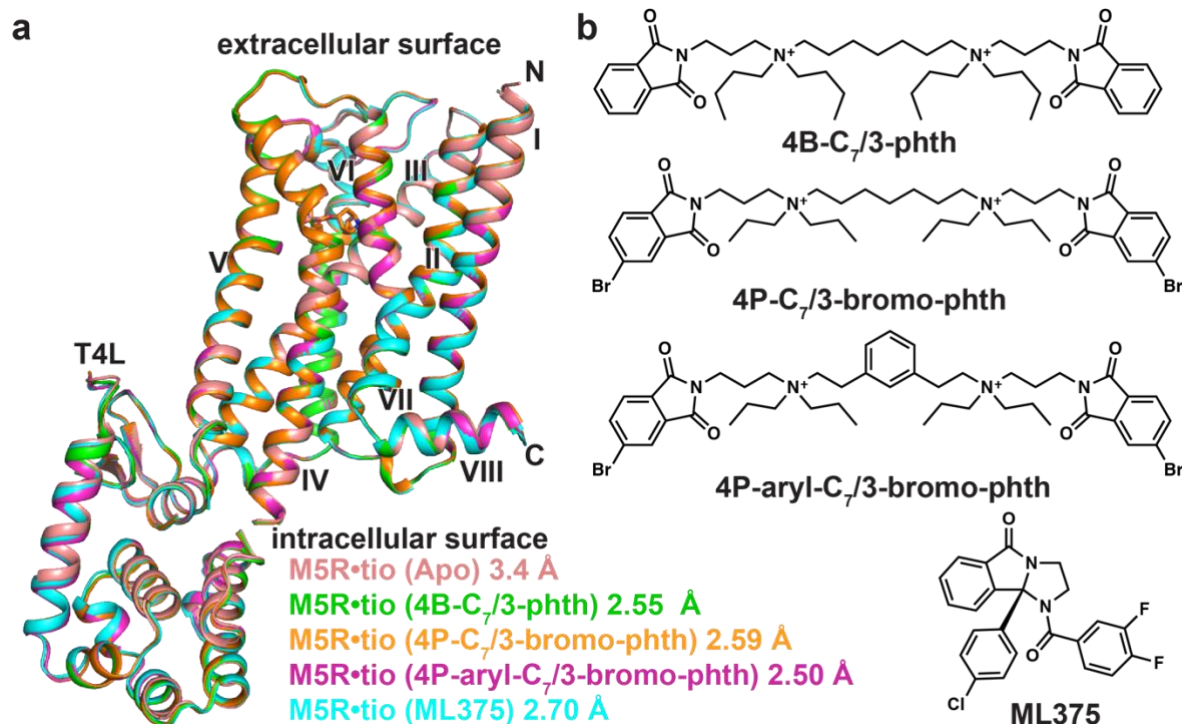

123

124 **Figure 1. Structures of M<sub>5</sub>-T4L bound to tiotropium.** (a) Overlay of five different M<sub>5</sub>  
125 mAChR structures determined in the presence of tiotropium and (b) different allosteric  
126 modulators. The structure from 4B-C<sub>7</sub>/3-phth was the most resolved of all the datasets and is  
127 used in all further comparisons (Supplementary Table 1).

128

129 To investigate the nature of NAMs binding to the M<sub>5</sub> mAChR, we attempted to obtain co-  
130 crystal structures. Given that the bis-ammonium alkane type ligands tend to have higher  
131 affinities for the M<sub>5</sub> mAChR than the prototypical modulator, gallamine (26), we tried to obtain  
132 a ternary complex structure of the M<sub>5</sub> mAChR with tiotropium and several bis-ammonium  
133 alkane ligands (Figure 1b). We initially used the modulator, 4B-C<sub>7</sub>/3-phth, which resulted in  
134 crystals that grew to a much larger size and diffracted to a resolution of 2.55 Å (Figure 1,  
135 Supplementary Table 1, Supplementary Figure 2). Based on previous data (27), we predicted  
136 that 4B-C<sub>7</sub>/3-phth would bind in the extracellular vestibule (ECV). While there were regions  
137 of strong electron density present in the ECV, we could not unambiguously model 4B-C<sub>7</sub>/3-  
138 phth into the density as a molecule of the precipitant, polyethylene glycol 400 (PEG400), also  
139 likely binds in this site (22, 28), and may explain why researchers have had difficulty in  
140 obtaining co-NAM bound structures for the mAChRs.

141

142 Subsequently, we designed two new bis-ammonium alkane analogs using the higher affinity  
143 4P-C<sub>7</sub>/3-phth scaffold (27) to try and improve modulator affinity (Figure 1b, Supplementary

144 **Figure 3a, Supplementary Table 2**) and detectability by X-rays. The first modification added  
145 two bromine atoms (4P-C<sub>7</sub>/3-bromo-phth) to increase the size of the phthalamide groups (29),  
146 and the second modification rigidified the flexible 7-carbon linker with an aromatic  
147 hydrocarbon (4P-aryl-C<sub>7</sub>/3-bromo-phth). Both ligands displayed an increased affinity for the  
148 M<sub>5</sub> mAChR versus 4B-C<sub>7</sub>/3-phth, but had a slightly reduced affinity in relation to the parent  
149 compound (4P-C<sub>7</sub>/3-phth) when assayed for NAM activity in inhibiting [<sup>3</sup>H]NMS radioligand  
150 binding (**Supplementary Figure 3a, Supplementary Table 2**). Like 4B-C<sub>7</sub>/3-phth, the addition  
151 of either 4P-C<sub>7</sub>/3-bromo-phth or 4P-aryl-C<sub>7</sub>/3-bromo-phth to purified M<sub>5</sub> mAChR and  
152 reconstitution into LCP yielded crystals that diffracted to a higher resolution (**Supplementary**  
153 **Table 1**). A full data set for 4P-aryl-C<sub>7</sub>/3-bromo-phth was collected at wavelength of 0.92 Å to  
154 maximize the anomalous Br signal in a single wavelength anomalous diffraction experiment,  
155 however, no such signal was detected, suggesting that 4P-aryl-C<sub>7</sub>/3-bromo-phth was not  
156 present in the structure. Since the structure was solved by merging a large number of datasets,  
157 there is possibility that the Br signal for the NAM would be averaged out if NAM occupancy  
158 is low. However, inspection of different datasets did not indicate that this was the case.

159

160 As an alternate strategy, we attempted to determine a co-crystal structure with the structurally  
161 diverse M<sub>5</sub> mAChR selective NAM, ML375 (19). In comparison to the bis-ammonium ligands,  
162 the addition of ML375 resulted in a slightly lower resolution structure (2.7 Å, **Supplementary**  
163 **Table 1**) and, as was the case with the bis-ammonium NAMs, we were not able to assign  
164 ML375 into any electron density. Comparison of all M<sub>5</sub> mAChR structures showed that they  
165 were nearly identical, with root mean square deviation values of 0.09–0.22 Å. The higher  
166 resolution 2.55 Å M<sub>5</sub>•tiotropium (4B-C<sub>7</sub>/3-phth) structure was used for further comparison, as  
167 this was the best resolved and modelled structure.

168

### 169 **Family-wide comparison of all mAChR subtypes.**

170 The solution of the M<sub>5</sub> mAChR structure allows the first complete subtype-wide comparison  
171 of this important GPCR family. The structure of the M<sub>5</sub> mAChR is similar to the previously  
172 determined structures of the M<sub>1</sub>-M<sub>4</sub> mAChR subtypes (21, 22, 30) with a root mean squared  
173 deviation of 0.5-0.8 Å (**Figure 2a**) for the seven-transmembrane domain across all subtypes.  
174 The five mAChR subtypes are most similar in the orthosteric binding site, which is the most  
175 conserved region of the receptor. The fact that our M<sub>5</sub> mAChR structure was obtained in  
176 complex with the same ligand (tiotropium), as the M<sub>1</sub>, M<sub>3</sub> and M<sub>4</sub> mAChR structures, allowed  
177 for specific, detailed comparison of residues lining this orthosteric binding site (**Figures 2b,c**).

178 This comparison demonstrated that the residues within the orthosteric pocket are absolutely  
 179 conserved between the receptors. Although there is no tiotropium bound M<sub>2</sub> mAChR structure,  
 180 there are now six different inactive state M<sub>2</sub> mAChR structures, which include structures bound  
 181 with the non-selective ligands QNB and NMS, and the M<sub>2</sub> mAChR selective ligand, AF-  
 182 DX384 (25). The 2.3 Å M<sub>2</sub>•NMS structure is most similar to the tiotropium bound mAChR  
 183 structures, though residues Y<sup>3.33</sup> and Y<sup>7.39</sup> of the “tyrosine lid” (Y<sup>3.33</sup>, Y<sup>6.51</sup>, and Y<sup>7.39</sup>) are  
 184 positioned in a distinct conformation in comparison to the tiotropium bound structures. These  
 185 differences in the tyrosine lid positions are more pronounced in the M<sub>2</sub>•AF-DX384 structures,  
 186 allowing the accommodation of this bulkier ligand into the orthosteric binding pocket (Figures  
 187 2b-c).  
 188

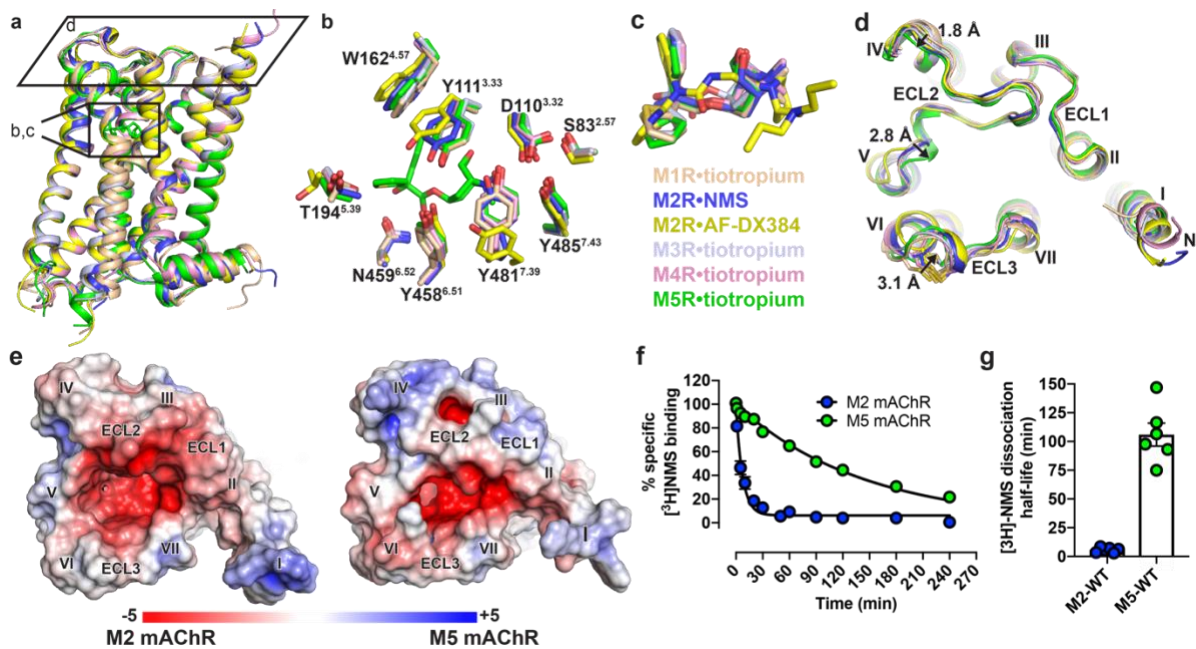

189  
 190 **Figure 2. Structural comparison of M<sub>1</sub>-M<sub>5</sub> mAChRs.** (a) The overall view of the M<sub>1</sub>-M<sub>5</sub>  
 191 mAChR structures aligned to the M<sub>5</sub> mAChR and shown as cartoons. M<sub>1</sub>•tiotropium is  
 192 coloured peach (PDB: 5CXV), M<sub>2</sub>•NMS dark blue (5ZKC), M<sub>2</sub>•AF-DX384 yellow (5ZKB),  
 193 M<sub>3</sub>•tiotropium light blue (4U15), M<sub>4</sub>•tiotropium pink (5DSG) and M<sub>5</sub>•tiotropium green  
 194 (6OL9). (b) Comparison of residues (stick representation) lining the orthosteric site with  
 195 tiotropium from the M<sub>5</sub> mAChR displayed, and (c) overlay of the orthosteric ligands. (d) View  
 196 from the extracellular surface comparing differences in the ECL regions across the M<sub>1</sub>-M<sub>5</sub>  
 197 mAChRs. Distances between the backbone of M<sub>1</sub> and M<sub>5</sub> mAChR residues in ECL2 and ECL3  
 198 are shown and indicated by arrows. (e) Electrostatic and surface potential of M<sub>2</sub> and M<sub>5</sub>  
 199 mAChR (+5kT/e in blue and -5kT/e in red) mapped on the surface of the receptors calculated

200 at pH 7.0 using PDB2PQR and APBS (31). (f) Comparison of dissociation rate and (g)  
201 dissociation half-life of [<sup>3</sup>H]NMS by the addition of 10 μM atropine at the M<sub>2</sub> and M<sub>5</sub>  
202 mAChRs.

---

203  
204 Subtle yet notable differences between the mAChR subtypes are observed for ECL2 and ECL3,  
205 corresponding to regions that are the least conserved across the receptors (Figure 2d). At ECL2  
206 there is a 1.8 Å difference across all five subtypes beginning at the first non-conserved residue  
207 of ECL2. As ECL2 progresses towards TM5, a conserved 3<sub>10</sub> helix motif moves inward by 2.8  
208 Å in the M<sub>5</sub> mAChR when compared to the M<sub>1</sub> structure. Similarly, the conserved ECL3  
209 disulphide bond is displaced inwards by 3.1 Å for the M<sub>3</sub> and M<sub>5</sub> mAChRs (Figure 2d), relative  
210 to the other subtypes. These observed differences in the positions of ECL2 and ECL3, along  
211 with differences in amino acid composition contribute to a more constricted entrance to the  
212 orthosteric binding site at the M<sub>5</sub> (and M<sub>3</sub>) versus the M<sub>2</sub> mAChR (Figure 2e). Furthermore,  
213 this contraction of the entrance in the antagonist-bound structures may contribute to the slower  
214 dissociation rate of orthosteric ligands from the M<sub>5</sub> and M<sub>3</sub> mAChRs, in comparison to other  
215 subtypes like the M<sub>2</sub> mAChR. For example, despite having similar equilibrium binding  
216 affinities, [<sup>3</sup>H]NMS dissociates 18-fold more slowly at the M<sub>5</sub> than the M<sub>2</sub> mAChR with half-  
217 lives of dissociation of 100 ± 11.6 and 5.6 ± 1.2 min, respectively (Figure 2f,g).

218  
219 **Structural differences between the extracellular vestibules (ECVs) of the M<sub>2</sub> and M<sub>5</sub>**  
220 **mAChRs.**

221 An alternative strategy to generating selective ligands is to target non-conserved allosteric sites  
222 (32). This has been extensively explored for the mAChR family where a palette of both positive  
223 and negative allosteric modulators has been identified (33, 34). Structural and mutagenesis  
224 studies have established that many of these ligands bind to a “common” allosteric site that is  
225 located above the orthosteric site and within an ECV (Figure 3, Supplementary Figure 4) (35).  
226 In fact, the M<sub>5</sub> mAChR has often served as model system for early research into understanding  
227 the binding mode and mechanism of selectivity for prototypical modulators, such as the bis-  
228 ammonium alkane ligands (Figure 1b), that have higher sensitivity for modulating the M<sub>2</sub>  
229 mAChR and lower sensitivity for the M<sub>5</sub> mAChR (26, 36-39). These studies identified non-  
230 conserved residues in ECL2 (P179<sup>-4</sup>, E182<sup>-1</sup>, and Q184<sup>+1</sup>; superscript indicates the position of  
231 ECL2 residues relative to the conserved Cys in ECL2) and TM7 (V474<sup>7.32</sup> and H484<sup>7.36</sup>) as  
232 residues that can account for M<sub>2</sub>/M<sub>5</sub> subtype selectivity. Comparison of the ECV between the



233 M<sub>2</sub> and M<sub>5</sub> mAChRs confirm differences in the orientations and positions of these residues that  
234 could mediate the selectivity. Namely, P179<sup>-4</sup> in ECL2 restricts the position of E182<sup>-1</sup> forcing  
235 the residue into the ECV near Q184<sup>+1</sup>. Residue Q184<sup>+1</sup>, which is a F/Y residue for the M<sub>1</sub>-M<sub>4</sub>  
236 mAChRs subtypes, is a key residue for the activity of many allosteric modulators. Other major  
237 differences between the M<sub>2</sub>/M<sub>5</sub> ECVs are in the positions of non-conserved residues lining the  
238 top of TM6 starting from S465<sup>6,58</sup> across ECL3 and down to residue H478<sup>7,36</sup> in TM7. At the  
239 M<sub>5</sub> mAChR these residues are bulkier and point more inward constricting the overall size of  
240 the ECV (Figure 3).

241

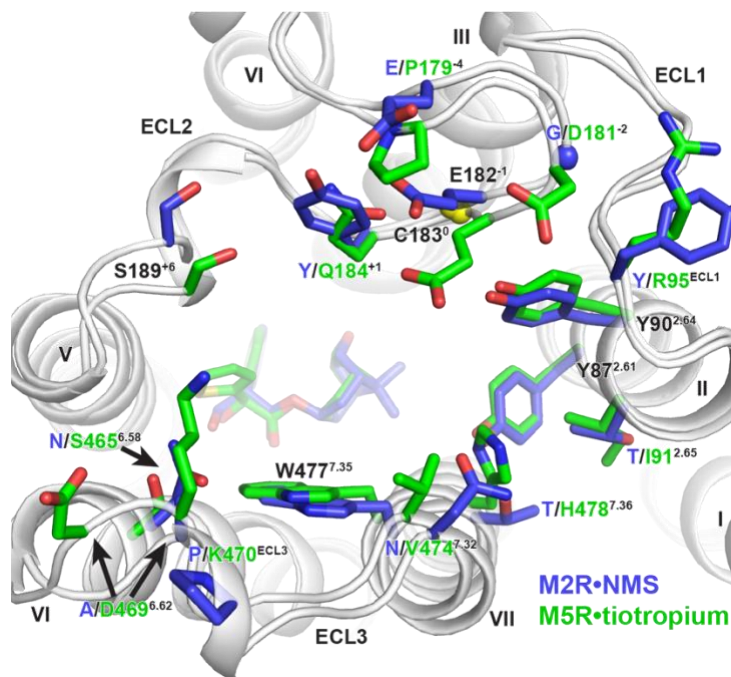

242

243 **Figure 3. Comparison of residues lining the extracellular vestibule of the M<sub>2</sub> and M<sub>5</sub>**  
244 **mAChR.** M<sub>2</sub>•NMS is shown in dark blue and M<sub>5</sub>•tiotropium in green. Conserved residues are  
245 labelled black and non-conserved residues are coloured according to receptor subtype.  
246 Residues are numbered based on the M<sub>5</sub> mAChR, with residues in ECL2 numbered relative to  
247 the conserved cysteine in ECL2, which is shown as a yellow sphere.

248

249 **Role of the M<sub>5</sub> and M<sub>2</sub> mAChR ECL regions in orthosteric and allosteric ligand binding.**

250 The effect of ECL regions on orthosteric ligand access and egress has significant biological  
251 and clinical relevance (40). Therefore, to investigate the role of the ECLs on modulating the  
252 slower dissociation kinetics of the M<sub>5</sub> mAChR in comparison to the M<sub>2</sub> mAChR, we designed  
253 full ECL1, ECL2, and/or ECL3 chimeric swaps between the two subtypes (Figure 4). The ECL  
254 chimeras had similar levels of expression and binding of [<sup>3</sup>H]NMS to wild type receptors

255 (Supplementary Table 3). As previously noted, the M<sub>2</sub> mAChR has a shorter half-life for  
256 [<sup>3</sup>H]NMS dissociation in comparison to the M<sub>5</sub> mAChR (Figure 2f). Incorporation of the M<sub>2</sub>  
257 ECL1 or ECL3 into the M<sub>5</sub> mAChR increased [<sup>3</sup>H]NMS dissociation, while the reciprocal  
258 chimeric swap decreased [<sup>3</sup>H]NMS dissociation at the M<sub>2</sub> mAChR. Unexpectedly, it was the  
259 ECL1 swaps that had the largest effect on [<sup>3</sup>H]NMS dissociation between the two subtypes,  
260 particularly at the M<sub>5</sub> mAChR (Figure 4, Supplementary Table 4). A possible structural  
261 explanation for this observation could be that R95<sup>ECL1</sup>, which is a conserved Tyr residue at the  
262 M<sub>1</sub>-M<sub>4</sub> subtypes, is capable of forming an ionic bond with either the M<sub>5</sub> ECL2 residue, D181<sup>-</sup>  
263 <sup>2</sup>, or in the case of the M<sub>2</sub> ECL1 chimera residue D173<sup>-3</sup> (Figure 3, Supplementary Figure 4).  
264 Such an interaction could tether ECL1 and ECL2 limiting their overall dynamics and thus  
265 reduce rates of orthosteric ligand dissociation. It is important to note that R95<sup>ECL1</sup> is involved  
266 in an ionic interaction mediated through the crystal lattice with a neighbouring T4L molecule  
267 (Supplementary Figure 2d-f), and as a result it does not directly interact with D181<sup>-2</sup> in the M<sub>5</sub>  
268 mAChR structure though it is well positioned to do so.

269

270 A hallmark feature of an allosteric ligand that modulates orthosteric ligand affinity is the ability  
271 to either increase or decrease the rate of dissociation of an orthosteric ligand. To examine the  
272 effect of allosteric modulators on NMS dissociation across the M<sub>5</sub> and M<sub>2</sub> ECL chimeras, we  
273 used the bis-ammonium alkane ligand 4P-C<sub>7</sub>/3-phth, which had been previously studied at the  
274 M<sub>2</sub> mAChR and had high affinity for the M<sub>5</sub> mAChR (Supplementary Table 2), or the M<sub>5</sub>  
275 selective modulator ML375 (19, 27). In the presence of ML375, [<sup>3</sup>H]NMS dissociation was  
276 reduced at the M<sub>5</sub> mAChR and had no effect at the M<sub>2</sub> mAChR, whereas the addition of 4P-  
277 C<sub>7</sub>/3-phth reduced radioligand dissociation at the M<sub>2</sub> mAChR but not at the M<sub>5</sub> mAChR (Figure  
278 4, Supplementary Table 4). The ECL1 and ECL3 chimeric swaps had little effect on the activity  
279 of ML375 for either receptor subtype, and slightly increased the activity of 4P-C<sub>7</sub>/3-phth at the  
280 M<sub>5</sub> mAChR. For the ECL2 chimeras, there was no effect on activity of ML375. However, there  
281 was a loss of 4P-C<sub>7</sub>/3-phth activity at the M<sub>2</sub> mAChR and a corresponding gain of activity at  
282 the M<sub>5</sub> mAChR. These results are in line with previous studies and highlight the importance of  
283 residues in ECL2, particularly M<sub>2</sub>-Y177 and M<sub>5</sub>-E184, on modulating the activity of bis-  
284 ammonium alkane ligands. Interestingly, when all three ECLs were swapped, the resulting M<sub>2</sub>  
285 and M<sub>5</sub> chimeric constructs functioned more like their swapped receptor counterpart. That is,  
286 for the M<sub>2</sub>-M<sub>5</sub>-all-ECL construct, 4P-C<sub>7</sub>/3-phth had little effect, and although ML375 did not  
287 retard [<sup>3</sup>H]NMS dissociation, it slightly increased the rate of [<sup>3</sup>H]NMS dissociation suggesting  
288 an allosteric mode of action (Figure 4, Supplementary Table 4). Conversely, for the M<sub>5</sub>-M<sub>2</sub>-

289 all-ECL construct, 4P-C<sub>7</sub>/3-phth retarded radioligand dissociation and, surprisingly, ML375  
290 had no effect. While none of the chimeric constructs ever fully switched the basal dissociation  
291 rate of [<sup>3</sup>H]NMS or ML375 activity to that observed for the corresponding WT constructs, the  
292 data nonetheless suggest that the ECL regions modulate the overall conformation of mAChRs  
293 and directly influence the dissociation of ligands from the orthosteric site.  
294

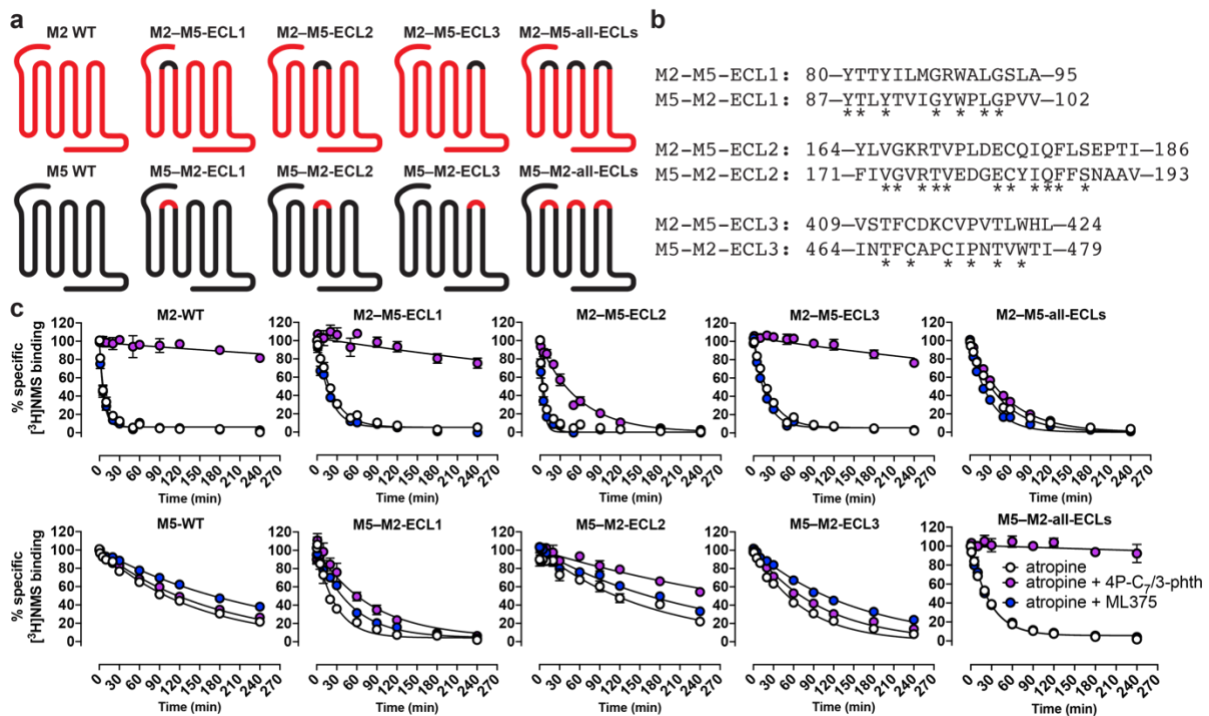

295

296 **Figure 4. [<sup>3</sup>H]NMS binding dissociation kinetic studies of chimeric swaps between the**  
297 **ECLs of the M<sub>2</sub> and M<sub>5</sub> mAChRs.** (a) Cartoons and (b) amino acid sequence composition  
298 for the M<sub>2</sub> and M<sub>5</sub> ECL chimeras used in this study, with conserved residues noted by an  
299 asterisk. (c) [<sup>3</sup>H]NMS re-association was prevented by the addition of 10 μM atropine, and  
300 radioligand dissociation was monitored in the absence or presence of 10 μM ML375 or 10 μM  
301 4P-C<sub>7</sub>/3-phth. Data points represent the mean ± S.E.M. of three or more independent  
302 experiments performed in duplicate. Quantitative parameters derived from this experiment are  
303 listed in Supplementary Table 4.

304

## 305 Discussion

306 Individual mAChR subtypes have long been pursued as drug targets for a range of CNS  
307 disorders, and recent studies have begun to validate the M<sub>5</sub> mAChR as a novel target for the  
308 treatment of drug addiction (4, 41). In this study, we have determined a high-resolution crystal  
309 structure of the M<sub>5</sub> mAChR, thus allowing the first subtype-wide comparison for any aminergic

310 GPCR subfamily. Introduction of the inactive state stabilizing mutation S117<sup>3.39</sup>R, which was  
311 recently used to stabilize the M<sub>2</sub> mAChR (25), was crucial to obtaining well-diffracting crystals  
312 and suggests that this mutation could be applied to aid the determination of inactive state  
313 structures for other related GPCRs. We further improved the resolution of the M<sub>5</sub> mAChR  
314 structure by adding allosteric modulators to the purified protein prior to crystallization. Despite  
315 the consistent increase in resolution that each of the allosteric modulator provided, we were  
316 not able to model any of the modulators into electron density. From a pharmacological  
317 perspective, a lack of modulator binding is not surprising, as all of the modulators tested in this  
318 study showed strong negative cooperativity with tiotropium (**Supplementary Figure 3b**).  
319 Nevertheless, it is still paradoxical that the addition of an allosteric modulator can clearly  
320 improve receptor crystallization and diffraction, though not be visible in any resulting  
321 structures. This phenomenon has been noted at other GPCRs, such as the M<sub>2</sub> mAChR that was  
322 crystallized in the presence of the modulator, alcuronium, and the CC chemokine receptor 2A  
323 that was crystallized in the presence of the modulator, AZD-6942, but where neither modulator  
324 could be observed in the resulting structures (25, 42).

325

326 Comparison of all five mAChR structures further confirms the well conserved transmembrane  
327 core and orthosteric binding site that has made the discovery of highly selective drugs for these  
328 receptor subtypes incredibly challenging. The most apparent structural differences between the  
329 mAChR subtypes is in the ECL regions. Though these differences are generally quite subtle  
330 they are important because they open up the possibility for designing selective molecules in a  
331 way that has not previously been possible (**Supplementary Figure 4**). For example, a recent  
332 crystal structure of the M<sub>2</sub> mAChR bound to the M<sub>2</sub>-selective antagonist AF-DX384 revealed  
333 that selectivity is mediated by differential interactions between the ligand and residues in  
334 ECL2, which lead to an outward displacement in ECL2 and the top of TM5 (**Figure 2d**) (25).  
335 Likewise, by utilizing knowledge of a single amino acid difference in ECL2 between the M<sub>2</sub>  
336 and M<sub>3</sub> mAChRs, molecular docking and structure-based design led to the discovery of a new  
337 M<sub>3</sub>-selective antagonist with 100-fold selectivity over the M<sub>2</sub> mAChR (43). These results are  
338 similar to the structure-based design of biased ligands targeting the D2 dopamine receptor that  
339 were designed by utilizing specific amino acid-ligand contacts in ECL2 and TM5 (44). Taken  
340 together, these findings indicate that the differential targeting of ECL residues may be a path  
341 forward for creating selective mAChR ligands. This is well supported by the fact that many  
342 mAChR-selective allosteric modulators interact with the ECL regions (27, 35), and suggest

343 that designing orthosteric ligands linked to allosteric pharmacophores, known as bitopic  
344 ligands, is a potential strategy for future structure-based drug design.

345

346 Drug discovery has typically focused on optimizing ligand affinity and selectivity. However,  
347 it is now apparent that binding kinetics are just as important (40, 45-47). This is illustrated two  
348 ways with the drug tiotropium as a pertinent example. First, tiotropium has slow rate of  
349 dissociation from the M<sub>3</sub> mAChR, which is a key feature of the drug that allows for a once  
350 daily dosing for the treatment of chronic obstructive pulmonary disease (48). Second, though  
351 tiotropium has the same equilibrium binding affinity for the M<sub>3</sub> and M<sub>2</sub> mAChRs, it exhibits  
352 kinetic selectivity for the M<sub>3</sub> over M<sub>2</sub> mAChR, by having substantially different rates of  
353 dissociation. This kinetic selectivity over the M<sub>2</sub> mAChR is postulated to be due to differences  
354 in the electrostatics and dynamics of the ECL region (48). The M<sub>5</sub> mAChR is similar to the M<sub>3</sub>  
355 mAChR with respect to having slow rates of orthosteric ligand dissociation (20), and data from  
356 our M<sub>2</sub>/M<sub>5</sub> ECL chimeras support the idea of the ECL regions mediating kinetic selectivity as  
357 [<sup>3</sup>H]NMS dissociation was switched between the M<sub>2</sub> and M<sub>5</sub> mAChRs (Figure 4). Notably,  
358 none of the combined ECL chimeras could ever fully switch the dissociation kinetics between  
359 subtypes, suggesting that other mechanisms are operative such as the global conformation of  
360 the ECLs. Our results also highlight the importance of the ECL regions on conferring  
361 sensitivity to allosteric modulators across different subtypes. By swapping out the entire ECL  
362 region between the M<sub>2</sub> and M<sub>5</sub> mAChRs we were able to completely alter the sensitivity of a  
363 modulator that is selective for the M<sub>2</sub> versus the M<sub>5</sub> mAChR and vice versa. These results  
364 support the importance of the ECL region for mediating ligand selectivity.

365

366 In summary, our reported M<sub>5</sub> mAChR crystal structure has allowed for the comparison of all  
367 five mAChR subtypes and has revealed that subtle differences in the ECL regions are a major  
368 determinant in ligand selectivity, regardless of the ligand being orthosteric or allosteric. As the  
369 M<sub>1</sub>, M<sub>4</sub>, and M<sub>5</sub> mAChRs continue to emerge as exciting drug targets for the treatment of CNS  
370 disorders, it will be important to understand both the structural and dynamic differences  
371 between all five mAChR subtypes in order to aid design of safer and more effective small-  
372 molecule therapeutics.

373

## 374 **METHODS**

375 **Cloning.** The human M<sub>5</sub> muscarinic receptor gene (cDNA.org) was cloned into a pFastBac  
376 vector containing an N-terminal Flag epitope and a C-terminal 10x histidine tag (cDNA.org).  
377 TEV cleavage site was introduced in order to remove the Flag epitope and the first 20 amino  
378 acids of the protein. Residues 225-430 of ICL3 were removed and replaced with T4L  
379 (Supplementary Figure 1). In addition, to stabilize the inactive state we introduced the mutation  
380 S117<sup>3,39</sup>R (23, 25). For pharmacology experiments M<sub>2</sub> and M<sub>5</sub> mAChR DNA was cloned into  
381 a pEF5/FTR/V5 vector (Invitrogen) using the Flp-In-CHO cell system (Invitrogen). To  
382 generate the M<sub>2</sub>/M<sub>5</sub> ECL chimeras overlap extension PCR was used with primers specific to  
383 each ECL region. All DNA constructs were sequenced to confirm the correct nucleotide  
384 sequence using the Australian Genome Research Facility (Melbourne, Australia).

385

386 **Synthesis of the bis-ammonium alkane ligands.** 4B-C<sub>7/3</sub>-phth and 4P-C<sub>7/3</sub>-phth were  
387 synthesized as previously described (27). Synthesis for 4P-C<sub>7/3</sub>-bromo-phth and 4P-aryl C<sub>7/3</sub>-  
388 bromo-phth is described in Supplementary Data.

389

390 **M<sub>5</sub> receptor expression and purification.** M<sub>5</sub>-T4L was expressed in Sf9 cells using the Bac-  
391 to-Bac Baculovirus Expression System (Invitrogen). Cells were infected at a cell density of 4.0  
392 x 10<sup>6</sup> cells/millilitre with 10 μM atropine. Cells were harvested 60-72 hours later. All  
393 purification steps were performed in the presence of 1 μM triptropium. Insect cells were lysed  
394 in a buffer containing 10 mM Tris pH 7.5, 1 mM EDTA, 1 mM MgCl<sub>2</sub>, 1 mg/ml iodoacetamide,  
395 benzonase, and protease inhibitors. Cell membranes were then solubilised in 30 mM HEPES  
396 pH 7.4, 750 mM NaCl, 30 % glycerol, 1 % dodecyl maltoside (DDM), 0.2 % cholate, 0.03 %  
397 cholesterol hemisuccinate (CHS), 1 mM MgCl<sub>2</sub>, 1 mg/ml iodoacetamide, benzonase and  
398 protease inhibitors for 90 minutes at 4°C. After removing the insoluble debris, 25 mL of Ni-  
399 NTA resin, 1 mg/ml iodoacetamide and protease inhibitors were added and incubated with the  
400 protein for 2 hours 4°C. The Ni-NTA resin was pelleted using a table top centrifuge and then  
401 washed using 30 mM HEPES pH 7.4, 750 mM NaCl, 30 % glycerol, 5 mM imidazole pH 8.0,  
402 0.1 % DDM, 0.02 % cholate and 0.003 % CHS. The protein was eluted using the same buffer  
403 supplemented with 250 mM imidazole. The elution was supplemented with 2 mM CaCl<sub>2</sub> and  
404 then loaded onto an anti-Flag M1 antibody column. The buffer/DDM was exchanged into 30  
405 mM HEPES pH 7.4, 100 mM NaCl, 2 mM CaCl<sub>2</sub>, 0.1 % lauryl maltose neopentyl glycol  
406 (LMNG) and 0.01 % CHS over the course of 30 min. The resin was then washed with 10x  
407 CMC buffer (30 mM HEPES pH 7.4, 100 mM NaCl, 0.01 % LMNG and 0.001 % CHS) with

408 2 mM CaCl<sub>2</sub> before the protein was eluted using the same buffer supplemented with 10 mM  
409 EDTA and 0.2 mg/ml FLAG peptide. TEV protease was added (1mg) overnight at 4°C before  
410 concentrating the protein for size-exclusion chromatography using a Superdex S200 increase  
411 column in 10x CMC buffer. Monodispersed fractions were pooled together (**Supplementary**  
412 **Figure 2**), concentrated to 80 absorbance units (~50 mg/ml) and flash frozen in small aliquots  
413 using liquid nitrogen.

414

415 **Crystallization and structure determination.** Purified M<sub>5</sub>-T4L(S3.39R) bound to tiotropium  
416 was crystallized using LCP. For allosteric modulator co-crystallization, the modulator was  
417 added to purified protein at a final concentration of 2.5 mM. The sample was incubated on ice  
418 for 3 hours before it was mixed into 10:1 (w/w) monoolein:cholesterol in 1:1.5 w/w  
419 protein:lipid ratio. LCP crystallization was performed by spotting 25-30 nL of samples on  
420 siliconized 96-well glass plate overlaying the samples with 600 nL of precipitant solution using  
421 the Gryphon LCP (Art Robbins Instruments). Sealed glass plates were incubated at 20 °C.  
422 Crystals appeared in the first 24 hours and grew to full size in the following 1-2 days. The best  
423 diffracting crystals grew in 100 mM DL-Malic acid pH 6.0, 220-280 mM ammonium tartrate  
424 dibasic and 37-41% PEG 400. For the data collection, whole drops were harvested using mesh  
425 grid loops (Mitegen) and flash frozen in liquid nitrogen.

426 X-ray diffraction data were collected at the SPring-8 (Japan) beamline BL32XU (49)  
427 and the MX2 beamline at the Australian Synchrotron (50). Diffraction data at SPring-8 was  
428 collected using the automatic data-collection system ZOO (51). Diffraction data was processed  
429 using KAMO (52) with XDS (53). The structure was solved using molecular replacement with  
430 M<sub>3</sub>-mT4L (4U15) as a search model for the receptor and an ensemble of T4L molecules for  
431 T4L. Structure refinement was performed with Phenix (54), and the models were validated  
432 with MolProbity (55). Structure figures were prepared with PyMol.

433

434 **Pharmacology of crystallization constructs.** Sf9 cells expressing M<sub>5</sub>-T4L (S117R) or WT  
435 M<sub>5</sub> mAChR were harvested after 60 hours. Sf9 cell membranes were prepared by  
436 homogenization and centrifugation. The final membrane pellet was resuspended in 20 mM  
437 HEPES pH 7.4 and 0.1 mM EDTA. Protein concentration was determined by absorbance at  
438 280 nm and membranes were stored at -80 °C. Assays were conducted in UniFilter-96 GF/B  
439 plates (PerkinElmer) with 1 ug of membranes per well in a final volume of 300 µl binding  
440 buffer consisting of 20 mM HEPES, 100 mM NaCl, and 10 mM MgCl<sub>2</sub> at pH 7.4. Non-specific  
441 binding was defined in the presence of 1 µM atropine. Assays were stopped by vacuum

442 filtration and washed three times with ice-cold 0.9% sodium chloride. Plates were allowed to  
443 dry before 40  $\mu$ L of Microscint-0 (PerkinElmer) was added to each well. Radioactivity was  
444 measured on a MicroBeta2 microplate counter. [ $^3$ H]NMS affinity ( $K_A$ ) was determined in  
445 saturation binding experiments using 7 different concentrations of [ $^3$ H]NMS (0.03–30 nM).  
446 Equilibration was 1 hour at room temperature. Competition binding assays and allosteric  
447 modulator assays were performed by incubating membranes with a  $K_A$  concentration of  
448 [ $^3$ H]NMS and varying concentrations of compounds. The reactions were left at room  
449 temperature and harvested after 4 hours. Similar competition experiments with tiotropium were  
450 performed in the absence and presence of 30  $\mu$ M of the allosteric modulators.

451

452 **Mammalian cell culture.** For stable expression, DNA constructs in pEF5/FTR/V5  
453 (ThermoFisher) were transfected into the Flp-In-CHO cell line (ThermoFisher) as previously  
454 described (22). A suspected error with the M<sub>2</sub>–M<sub>5</sub>-ECL1 and M<sub>5</sub>–M<sub>2</sub>-all-ECL cell lines led  
455 us to resequencing all of the constructs and performing transient transfections for these  
456 constructs and also retesting all of the M<sub>2</sub> cell lines. Cells were maintained in DMEM  
457 containing 10% FBS, 16 mM HEPES pH 7.4, and 400  $\mu$ g ml<sup>-1</sup> hygromycin B. Mycoplasma  
458 testing was performed regularly on cell lines using the MycoAlert™ kit (Lonza); cell lines  
459 were mycoplasma-free before experiments were conducted.

460

461 **Pharmacology of the M<sub>2</sub>/M<sub>5</sub> mAChR chimeras.** Flp-In-CHO cells either stably or transiently  
462 expressing the M<sub>2</sub>/M<sub>5</sub> mAChR chimeras were seeded in 96-well Isoplates (PerkinElmer Life  
463 Sciences) at a concentration of 20,000 – 25,000 cells per well a day before the experiment was  
464 performed in a humidified atmosphere at 37°C, 5% CO<sub>2</sub>. The next day, cells were washed with  
465 assay buffer consisting of 110 mM NaCl, 5.4 mM KCl, 1.8 mM CaCl<sub>2</sub>, 1 mM MgSO<sub>4</sub>, 25 mM  
466 glucose, 50 mM HEPES, and 58 mM sucrose, pH 7.4. Saturation binding experiments were  
467 performed similar to above with assay volumes of 150  $\mu$ L. Kinetic binding dissociation  
468 experiments were performed by incubating cells with 0.2 nM [ $^3$ H]NMS for 3 hours at room  
469 temperature before a reverse time-course was performed. Dissociation was initiated by atropine  
470 and treatments consisted of 10  $\mu$ M atropine and either vehicle, 10  $\mu$ M ML375, or 10  $\mu$ M 4P-  
471 C7/3-phth being added at the indicated time points. At the end of the time course, radioligand  
472 was removed by inverting the plate and followed by 3 washes with ice-cold 0.9% sodium  
473 chloride. Bound radioactivity was assessed by liquid scintillation using Optiphase Supermix  
474 (100  $\mu$ L) and counting on a MicroBeta2 Plate Counter.



475

476 **Data Analysis.** Data were analysed using Prism 8.2 (GraphPad). Saturation binding curves  
477 were fitted to a one site binding curve accounting for total and non-specific binding.  
478 Competition binding curves were fitted to a one-site binding inhibition model. Allosteric  
479 titrations between [<sup>3</sup>H]NMS and modulators were fit to an allosteric ternary complex model.  
480 Radioligand dissociation data were fitted to a mono-exponential decay function.

481

482 **Author Contributions.** Z.V., P.R.G., and D.M.T. performed cloning, protein expression,  
483 purification, crystallization, data collection, structure refinement, and radioligand binding  
484 experiments on the crystallization constructs. K.H. collected and processed data all the data  
485 from SPring-8. S.J. and J.B. designed and performed the synthesis of 4P-C<sub>7/3</sub>-bromo-phth and  
486 4P-aryl-C<sub>7/3</sub>-bromo-phth. R.R. and J.B. designed and performed the synthesis of 4P-C<sub>7/3</sub>-phth  
487 and 4B-C<sub>7/3</sub>-phth. For the M<sub>2</sub>/M<sub>5</sub> mAChR chimera experiments: Z.V. performed cloning and  
488 generated the stable cell lines. Molecular pharmacology experiments were performed by  
489 A.E.B., Z.V., E.T.W., G.T., and W.A.C.B. C.L. provided ML375. C.V., C.L., J.B., A.B.T.,  
490 P.M.S., A.C., and D.M.T. provided overall project design and supervision. Z.V., P.R.G., A.C.,  
491 and D.M.T. wrote the manuscript with contributions from all authors.

492

493 **Acknowledgements.** The synchrotron radiation experiments were performed at the BL32XU  
494 beamline at SPring-8 with the approval of JASRI (Proposal No. 2017B2731) and the MX2  
495 beamline at the Australian Synchrotron (CAP13670). This work was funded by a Wellcome  
496 Trust Collaborative Award (201529/Z/16/Z), and supported by National Health and Medical  
497 Research Council of Australia (NHMRC) project (APP1138448) and program (APP1055134)  
498 grants. J.B. is a NHMRC Principal Research Fellow, P.M.S. and A.C. are NHMRC Senior  
499 Principal Research Fellows, and D.M.T. is an Australian Research Council Discovery Early  
500 Career Research Fellow.

501

## 502 **Uncategorized References**

- 503 1. M. P. Caulfield, N. J. Birdsall, International Union of Pharmacology. XVII.  
504 Classification of muscarinic acetylcholine receptors. *Pharmacol Rev* **50**, 279-290  
505 (1998).

- 506 2. A. C. Kruse, J. Hu, B. K. Kobilka, J. Wess, Muscarinic acetylcholine receptor X-ray  
507 structures: potential implications for drug development. *Curr Opin Pharmacol* **16**, 24-  
508 30 (2014).
- 509 3. R. P. Yasuda *et al.*, Development of antisera selective for m4 and m5 muscarinic  
510 cholinergic receptors: distribution of m4 and m5 receptors in rat brain. *Mol*  
511 *Pharmacol* **43**, 149-157 (1993).
- 512 4. A. M. Bender, A. T. Garrison, C. W. Lindsley, The Muscarinic Acetylcholine  
513 Receptor M5: Therapeutic Implications and Allosteric Modulation. *ACS Chem*  
514 *Neurosci* **10**, 1025-1034 (2019).
- 515 5. G. L. Forster, C. D. Blaha, Laterodorsal tegmental stimulation elicits dopamine efflux  
516 in the rat nucleus accumbens by activation of acetylcholine and glutamate receptors in  
517 the ventral tegmental area. *Eur J Neurosci* **12**, 3596-3604 (2000).
- 518 6. G. L. Forster, C. D. Blaha, Pedunculopontine tegmental stimulation evokes striatal  
519 dopamine efflux by activation of acetylcholine and glutamate receptors in the  
520 midbrain and pons of the rat. *Eur J Neurosci* **17**, 751-762 (2003).
- 521 7. G. L. Forster, J. S. Yeomans, J. Takeuchi, C. D. Blaha, M5 muscarinic receptors are  
522 required for prolonged accumbal dopamine release after electrical stimulation of the  
523 pons in mice. *J Neurosci* **22**, RC190 (2002).
- 524 8. S. Steidl, A. D. Miller, C. D. Blaha, J. S. Yeomans, M(5) muscarinic receptors  
525 mediate striatal dopamine activation by ventral tegmental morphine and  
526 pedunculopontine stimulation in mice. *PLoS One* **6**, e27538 (2011).
- 527 9. A. Elhusseiny, Z. Cohen, A. Olivier, D. B. Stanimirovic, E. Hamel, Functional  
528 acetylcholine muscarinic receptor subtypes in human brain microcirculation:  
529 identification and cellular localization. *J Cereb Blood Flow Metab* **19**, 794-802  
530 (1999).
- 531 10. S. K. Tayebati, M. A. Di Tullio, D. Tomassoni, F. Amenta, Localization of the m5  
532 muscarinic cholinergic receptor in rat circle of Willis and pial arteries. *Neuroscience*  
533 **122**, 205-211 (2003).
- 534 11. R. Araya *et al.*, Loss of M5 muscarinic acetylcholine receptors leads to  
535 cerebrovascular and neuronal abnormalities and cognitive deficits in mice. *Neurobiol*  
536 *Dis* **24**, 334-344 (2006).
- 537 12. M. Yamada *et al.*, Cholinergic dilation of cerebral blood vessels is abolished in M(5)  
538 muscarinic acetylcholine receptor knockout mice. *Proc Natl Acad Sci U S A* **98**,  
539 14096-14101 (2001).

- 540 13. A. S. Basile *et al.*, Deletion of the M5 muscarinic acetylcholine receptor attenuates  
541 morphine reinforcement and withdrawal but not morphine analgesia. *Proc Natl Acad*  
542 *Sci U S A* **99**, 11452-11457 (2002).
- 543 14. A. Fink-Jensen *et al.*, Role for M5 muscarinic acetylcholine receptors in cocaine  
544 addiction. *J Neurosci Res* **74**, 91-96 (2003).
- 545 15. M. Thomsen *et al.*, Reduced cocaine self-administration in muscarinic M5  
546 acetylcholine receptor-deficient mice. *J Neurosci* **25**, 8141-8149 (2005).
- 547 16. A. E. Berizzi *et al.*, Muscarinic M5 receptors modulate ethanol seeking in rats.  
548 *Neuropsychopharmacology* **43**, 1510-1517 (2018).
- 549 17. R. W. Gould *et al.*, Acute Negative Allosteric Modulation of M5 Muscarinic  
550 Acetylcholine Receptors Inhibits Oxycodone Self-Administration and Cue-Induced  
551 Reactivity with No Effect on Antinociception. *ACS Chem Neurosci*  
552 10.1021/acchemneuro.9b00274 (2019).
- 553 18. B. W. Gunter *et al.*, Selective inhibition of M5 muscarinic acetylcholine receptors  
554 attenuates cocaine self-administration in rats. *Addict Biol* **23**, 1106-1116 (2018).
- 555 19. P. R. Gentry *et al.*, Discovery of the first M5-selective and CNS penetrant negative  
556 allosteric modulator (NAM) of a muscarinic acetylcholine receptor: (S)-9b-(4-  
557 chlorophenyl)-1-(3,4-difluorobenzoyl)-2,3-dihydro-1H-imidazo[2,1-a]isoindol-  
558 5(9bH)-one (ML375). *J Med Chem* **56**, 9351-9355 (2013).
- 559 20. D. A. Sykes *et al.*, The Influence of receptor kinetics on the onset and duration of  
560 action and the therapeutic index of NVA237 and tiotropium. *J Pharmacol Exp Ther*  
561 **343**, 520-528 (2012).
- 562 21. A. C. Kruse *et al.*, Structure and dynamics of the M3 muscarinic acetylcholine  
563 receptor. *Nature* **482**, 552-556 (2012).
- 564 22. D. M. Thal *et al.*, Crystal structures of the M1 and M4 muscarinic acetylcholine  
565 receptors. *Nature* **531**, 335-340 (2016).
- 566 23. Y. Kajiwara, S. Yasuda, Y. Takamuku, T. Murata, M. Kinoshita, Identification of  
567 thermostabilizing mutations for a membrane protein whose three-dimensional  
568 structure is unknown. *J Comput Chem* **38**, 211-223 (2017).
- 569 24. J. A. Ballesteros, H. Weinstein, "[19] Integrated methods for the construction of  
570 three-dimensional models and computational probing of structure-function relations  
571 in G protein-coupled receptors" in *Methods in Neurosciences*, S. C. Sealfon, Ed.  
572 (Academic Press, 1995), vol. 25, pp. 366-428.

- 573 25. R. Suno *et al.*, Structural insights into the subtype-selective antagonist binding to the  
574 M2 muscarinic receptor. *Nat Chem Biol* **14**, 1150-1158 (2018).
- 575 26. X. P. Huang, S. Prilla, K. Mohr, J. Ellis, Critical amino acid residues of the common  
576 allosteric site on the M2 muscarinic acetylcholine receptor: more similarities than  
577 differences between the structurally divergent agents gallamine and  
578 bis(ammonio)alkane-type hexamethylene-bis-[dimethyl-(3-  
579 phthalimidopropyl)ammonium]dibromide. *Mol Pharmacol* **68**, 769-778 (2005).
- 580 27. R. O. Dror *et al.*, Structural basis for modulation of a G-protein-coupled receptor by  
581 allosteric drugs. *Nature* **503**, 295-299 (2013).
- 582 28. T. S. Thorsen, R. Matt, W. I. Weis, B. K. Kobilka, Modified T4 Lysozyme Fusion  
583 Proteins Facilitate G Protein-Coupled Receptor Crystallogensis. *Structure* **22**, 1657-  
584 1664 (2014).
- 585 29. W. Bender, M. Staudt, C. Trankle, K. Mohr, U. Holzgrabe, Probing the size of a  
586 hydrophobic binding pocket within the allosteric site of muscarinic acetylcholine M2-  
587 receptors. *Life Sci* **66**, 1675-1682 (2000).
- 588 30. K. Haga *et al.*, Structure of the human M2 muscarinic acetylcholine receptor bound to  
589 an antagonist. *Nature* **482**, 547-551 (2012).
- 590 31. E. Jurrus *et al.*, Improvements to the APBS biomolecular solvation software suite.  
591 *Protein Sci* **27**, 112-128 (2018).
- 592 32. D. M. Thal, A. Glukhova, P. M. Sexton, A. Christopoulos, Structural insights into G-  
593 protein-coupled receptor allostery. *Nature* **559**, 45-53 (2018).
- 594 33. A. Bock, R. Schrage, K. Mohr, Allosteric modulators targeting CNS muscarinic  
595 receptors. *Neuropharmacology* **136**, 427-437 (2018).
- 596 34. K. J. Gregory, P. M. Sexton, A. Christopoulos, Allosteric modulation of muscarinic  
597 acetylcholine receptors. *Curr Neuropharmacol* **5**, 157-167 (2007).
- 598 35. W. A. C. Burger, P. M. Sexton, A. Christopoulos, D. M. Thal, Toward an  
599 understanding of the structural basis of allostery in muscarinic acetylcholine  
600 receptors. *J Gen Physiol* **150**, 1360-1372 (2018).
- 601 36. S. Buller, D. P. Zlotos, K. Mohr, J. Ellis, Allosteric site on muscarinic acetylcholine  
602 receptors: a single amino acid in transmembrane region 7 is critical to the subtype  
603 selectivities of caracurine V derivatives and alkane-bisammonium ligands. *Mol*  
604 *Pharmacol* **61**, 160-168 (2002).

- 605 37. A. L. Gnagey, M. Seidenberg, J. Ellis, Site-directed mutagenesis reveals two epitopes  
606 involved in the subtype selectivity of the allosteric interactions of gallamine at  
607 muscarinic acetylcholine receptors. *Mol Pharmacol* **56**, 1245-1253 (1999).
- 608 38. S. Prilla, J. Schrobang, J. Ellis, H. D. Holtje, K. Mohr, Allosteric interactions with  
609 muscarinic acetylcholine receptors: complex role of the conserved tryptophan  
610 M2422Trp in a critical cluster of amino acids for baseline affinity, subtype selectivity,  
611 and cooperativity. *Mol Pharmacol* **70**, 181-193 (2006).
- 612 39. U. Voigtlander *et al.*, Allosteric site on muscarinic acetylcholine receptors:  
613 identification of two amino acids in the muscarinic M2 receptor that account entirely  
614 for the M2/M5 subtype selectivities of some structurally diverse allosteric ligands in  
615 N-methylscopolamine-occupied receptors. *Mol Pharmacol* **64**, 21-31 (2003).
- 616 40. J. R. Lane, L. T. May, R. G. Parton, P. M. Sexton, A. Christopoulos, A kinetic view  
617 of GPCR allostery and biased agonism. *Nat Chem Biol* **13**, 929-937 (2017).
- 618 41. A. C. Kruse *et al.*, Muscarinic acetylcholine receptors: novel opportunities for drug  
619 development. *Nat Rev Drug Discov* **13**, 549-560 (2014).
- 620 42. A. K. Apel *et al.*, Crystal Structure of CC Chemokine Receptor 2A in Complex with  
621 an Orthosteric Antagonist Provides Insights for the Design of Selective Antagonists.  
622 *Structure* **27**, 427-438.e425 (2019).
- 623 43. H. Liu *et al.*, Structure-guided development of selective M3 muscarinic acetylcholine  
624 receptor antagonists. *Proc Natl Acad Sci U S A* **115**, 12046-12050 (2018).
- 625 44. J. D. McCorvy *et al.*, Structure-inspired design of beta-arrestin-biased ligands for  
626 aminergic GPCRs. *Nat Chem Biol* **14**, 126-134 (2018).
- 627 45. A. Strasser, H. J. Wittmann, R. Seifert, Binding Kinetics and Pathways of Ligands to  
628 GPCRs. *Trends Pharmacol Sci* **38**, 717-732 (2017).
- 629 46. D. C. Swinney, B. A. Haubrich, I. Van Liefde, G. Vauquelin, The Role of Binding  
630 Kinetics in GPCR Drug Discovery. *Curr Top Med Chem* **15**, 2504-2522 (2015).
- 631 47. R. A. Copeland, The drug-target residence time model: a 10-year retrospective. *Nat*  
632 *Rev Drug Discov* **15**, 87-95 (2016).
- 633 48. C. S. Tautermann *et al.*, Molecular basis for the long duration of action and kinetic  
634 selectivity of tiotropium for the muscarinic M3 receptor. *J Med Chem* **56**, 8746-8756  
635 (2013).
- 636 49. K. Hirata *et al.*, Achievement of protein micro-crystallography at SPring-8 beamline  
637 BL32XU. *Journal of Physics: Conference Series* **425**, 012002 (2013).

- 638 50. D. Arago *et al.*, MX2: a high-flux undulator microfocus beamline serving both the  
639 chemical and macromolecular crystallography communities at the Australian  
640 Synchrotron. *J Synchrotron Radiat* **25**, 885-891 (2018).
- 641 51. K. Hirata *et al.*, ZOO: an automatic data-collection system for high-throughput  
642 structure analysis in protein microcrystallography. *Acta Crystallogr D Struct Biol* **75**,  
643 138-150 (2019).
- 644 52. K. Yamashita, K. Hirata, M. Yamamoto, KAMO: towards automated data processing  
645 for microcrystals. *Acta Crystallogr D Struct Biol* **74**, 441-449 (2018).
- 646 53. W. Kabsch, Xds. *Acta Crystallogr D Biol Crystallogr* **66**, 125-132 (2010).
- 647 54. P. D. Adams *et al.*, PHENIX: a comprehensive Python-based system for  
648 macromolecular structure solution. *Acta Crystallogr D Biol Crystallogr* **66**, 213-221  
649 (2010).
- 650 55. V. B. Chen *et al.*, MolProbity: all-atom structure validation for macromolecular  
651 crystallography. *Acta Crystallogr D Biol Crystallogr* **66**, 12-21 (2010).
- 652
